# Supplementary material for: UNC45A deficiency causes microvillus inclusion disease–like phenotype by impairing myosin VB–dependent apical trafficking
Source: JCI journal article supplement (doi:10.1172/jci154997), 2022-05-15
Supplement: sd2 [file 2]

**Table 1. Patient Characteristics**

|                                     | P1                                                                                                                                                                                                | P2                                                                                                                         | P3                                                       | P4                                 | P5                        | P6                              |
|-------------------------------------|---------------------------------------------------------------------------------------------------------------------------------------------------------------------------------------------------|----------------------------------------------------------------------------------------------------------------------------|----------------------------------------------------------|------------------------------------|---------------------------|---------------------------------|
| <b>Origin</b>                       | Turkish                                                                                                                                                                                           | United Kingdom                                                                                                             | French                                                   | French (West Indies)               | Turkish                   | Turkish                         |
| <b>Current age</b>                  | 6 y                                                                                                                                                                                               | 2 y                                                                                                                        | 22 y                                                     | 10.5 y                             | died 93 <sup>rd</sup> day | 3 m                             |
| <b>Onset age</b>                    | 3 weeks                                                                                                                                                                                           | 1 week                                                                                                                     | 1 week                                                   | 4 days                             | 1 day                     | 5 days                          |
| <b>Severe diarrhea</b>              | yes, with hypovolemic shock                                                                                                                                                                       | yes                                                                                                                        | yes, intermittent until 10 y                             | yes                                | yes                       | yes                             |
| <b>Duodenal villous atrophy</b>     | yes                                                                                                                                                                                               | yes                                                                                                                        | yes                                                      | yes                                | ND                        | ND                              |
| <b>Sub apical PAS accumulation</b>  | yes                                                                                                                                                                                               | yes                                                                                                                        | yes                                                      | yes                                | ND                        | ND                              |
| <b>Sub apical CD10 accumulation</b> | yes                                                                                                                                                                                               | yes                                                                                                                        | ND                                                       | yes                                | ND                        | ND                              |
| <b>Electron microscopy</b>          | Vesicles or tubulovesicular structures<br>MVI<br>Basolateral microvilli<br>large lysosomes/autophagosomes<br>Defective microvilli anchored deep in the cytoplasm<br>thickened terminal web region | Vesicles or tubulovesicular structures<br>Defective microvilli<br>Basolateral microvilli<br>large lysosomes/autophagosomes | ND                                                       | ND                                 | ND                        | ND                              |
| <b>Treatment</b>                    | TPN<br>Total enterectomy                                                                                                                                                                          | TPN                                                                                                                        | Exclusive enteral nutrition                              | TPN<br>Small bowel transplantation | TPN                       | TPN                             |
| <b>Cholestasis</b>                  | yes                                                                                                                                                                                               | no                                                                                                                         | yes                                                      | no                                 | yes                       | yes                             |
| <b>Bone fragility</b>               | Fracture of the left inferior part of the femur at 7 <sup>th</sup> months and at 2 y<br>Fracture of the right wrist at 1 y                                                                        | no                                                                                                                         | Fracture of the scapula at 7 y<br>Other fracture at 10 y | no                                 | ND                        | One bone fracture upon delivery |
| <b>Deafness</b>                     | no                                                                                                                                                                                                | no                                                                                                                         | yes                                                      | no                                 | no                        | ND                              |

---

|                                 |    |    |                                                                                                                               |    |    |    |
|---------------------------------|----|----|-------------------------------------------------------------------------------------------------------------------------------|----|----|----|
| <b>Other<br/>manifestations</b> | no | no | blind: right<br>anophthalmia,<br>Peters<br>anomaly &<br>left pyramidal<br>cataract /<br>severe ID &<br>behavioral<br>disorder | ID | ND | ND |
|---------------------------------|----|----|-------------------------------------------------------------------------------------------------------------------------------|----|----|----|

---

ND: not determined; ID: intellectual disability; TPN: total parenteral nutrition; MVI, microvillus inclusion.
