# Supplementary material for: UNC45A deficiency causes microvillus inclusion disease–like phenotype by impairing myosin VB–dependent apical trafficking
Source: JCI journal article supplement (doi:10.1172/jci154997), 2022-05-15
Supplement: sd3 [file 3]

**Supplementary Table 2: Characteristics of UNC45A variants**

|           | Variant<br>NM_018671.4 | Consequence    | SIFT        | POLYPHEN             | Mutation<br>taster | CADD | gnomAD<br>Allele<br>frequency |
|-----------|------------------------|----------------|-------------|----------------------|--------------------|------|-------------------------------|
| <b>P1</b> |                        |                |             |                      |                    |      |                               |
| <b>P5</b> | c.710T>C               | Leu237Pro      | Deleterious | Possibly<br>damaging | Disease<br>causing | 27.2 | 3.99e-6                       |
| <b>P6</b> |                        |                |             |                      |                    |      |                               |
|           | c.721C>T               | Arg241*        | Not scored  | Not scored           | Not scored         | 23   | Not observed                  |
| <b>P2</b> |                        |                |             |                      |                    |      |                               |
|           | c.2182G>A              | Glu728Lys      | Deleterious | Probably<br>damaging | Disease<br>causing | 27.4 | 6.39e-6                       |
|           | c.1452delinsGCA        | Asp484Glufs*17 | Not scored  | Not scored           | Not scored         | 23   | Not observed                  |
| <b>P3</b> |                        |                |             |                      |                    |      |                               |
|           | c.2512G>C              | Ala838Pro      | Tolerated   | Probably<br>damaging | Disease<br>causing | 25.5 | Not observed                  |
| <b>P4</b> | c.689C>G               | Thr230Arg      | Deleterious | Possibly<br>damaging | Disease<br>causing | 25   | Not observed                  |

CADD: Combined Annotation Dependent Depletion.
